# Supplementary material for: Association between Proximity to a Health Center and Early Childhood Mortality in Madagascar
Source: PLOS journal article supplement (doi:10.1371/journal.pone.0038370), 2012-06-04
Supplement: S2 (10.1371/journal.pone.0038370.s002) [file journal.pone.0038370.s002]

**Table S2.** Numbers, proportions, and ORs with 95% CIs between proximity to a health center and health outcomes for the births which were liveborn singleton births from January 2004 to July 2009 by the birth order ( $n = 9443$ )

|                                                            | Total<br><i>n</i> | Case<br><i>n</i> | (%)   | Crude |             | Adjusted model 1 <sup>a</sup> |             | Adjusted model 2 <sup>b</sup> |              |
|------------------------------------------------------------|-------------------|------------------|-------|-------|-------------|-------------------------------|-------------|-------------------------------|--------------|
|                                                            |                   |                  |       | OR    | (95% CI)    | OR                            | (95% CI)    | OR                            | (95% CI)     |
| <b>First birth order (<math>n = 2902</math>)</b>           |                   |                  |       |       |             |                               |             |                               |              |
| Neonatal mortality                                         |                   |                  |       |       |             |                               |             |                               |              |
| ≤1.5 km                                                    | 846               | 27               | (3.2) | 0.75  | (0.43–1.30) | 0.80                          | (0.44–1.44) | 0.63                          | (0.26–1.55)  |
| >1.5–3.0 km                                                | 654               | 28               | (4.3) | 1     | (reference) | 1                             | (reference) | 1                             | (reference)  |
| >3.0–5.0 km                                                | 595               | 21               | (3.5) | 0.83  | (0.46–1.48) | 0.76                          | (0.42–1.37) | 0.95                          | (0.42–2.16)  |
| >5.0–10.0 km                                               | 525               | 16               | (3.0) | 0.71  | (0.38–1.33) | 0.66                          | (0.34–1.25) | 0.87                          | (0.36–2.08)  |
| >10 km                                                     | 282               | 6                | (2.1) | 0.49  | (0.20–1.20) | 0.48                          | (0.19–1.23) | 0.54                          | (0.14–2.03)  |
| Infant mortality                                           |                   |                  |       |       |             |                               |             |                               |              |
| ≤1.5 km                                                    | 846               | 43               | (5.1) | 0.81  | (0.52–1.26) | 0.87                          | (0.54–1.40) | 0.80                          | (0.41–1.57)  |
| >1.5–3.0 km                                                | 654               | 43               | (6.6) | 1     | (reference) | 1                             | (reference) | 1                             | (reference)  |
| >3.0–5.0 km                                                | 595               | 32               | (5.4) | 0.83  | (0.52–1.34) | 0.77                          | (0.48–1.25) | 0.95                          | (0.49–1.82)  |
| >5.0–10.0 km                                               | 525               | 23               | (4.4) | 0.66  | (0.39–1.12) | 0.59                          | (0.34–1.00) | 0.77                          | (0.38–1.55)  |
| >10 km                                                     | 282               | 10               | (3.5) | 0.53  | (0.26–1.09) | 0.49                          | (0.24–1.03) | 0.49                          | (0.18–1.38)  |
| <b>Second or third birth order (<math>n = 4229</math>)</b> |                   |                  |       |       |             |                               |             |                               |              |
| Neonatal mortality                                         |                   |                  |       |       |             |                               |             |                               |              |
| ≤1.5 km                                                    | 1192              | 11               | (0.9) | 0.91  | (0.38–2.19) | 1.12                          | (0.45–2.83) | 0.72                          | (0.20–2.63)  |
| >1.5–3.0 km                                                | 986               | 10               | (1.0) | 1     | (reference) | 1                             | (reference) | 1                             | (reference)  |
| >3.0–5.0 km                                                | 887               | 14               | (1.6) | 1.54  | (0.67–3.57) | 1.69                          | (0.72–3.95) | 0.81                          | (0.25–2.65)  |
| >5.0–10.0 km                                               | 783               | 18               | (2.3) | 2.29  | (1.03–5.12) | 2.77                          | (1.19–6.44) | 3.01                          | (1.10–8.25)  |
| >10 km                                                     | 381               | 6                | (1.6) | 1.55  | (0.54–4.42) | 2.04                          | (0.67–6.24) | 3.30                          | (0.91–12.03) |
| Infant mortality                                           |                   |                  |       |       |             |                               |             |                               |              |
| ≤1.5 km                                                    | 1192              | 21               | (1.8) | 0.69  | (0.38–1.25) | 0.93                          | (0.50–1.73) | 1.03                          | (0.41–2.57)  |
| >1.5–3.0 km                                                | 986               | 25               | (2.5) | 1     | (reference) | 1                             | (reference) | 1                             | (reference)  |
| >3.0–5.0 km                                                | 887               | 29               | (3.3) | 1.30  | (0.75–2.25) | 1.24                          | (0.72–2.16) | 1.44                          | (0.66–3.13)  |
| >5.0–10.0 km                                               | 783               | 44               | (5.6) | 2.30  | (1.39–3.83) | 2.21                          | (1.30–3.74) | 2.91                          | (1.37–6.17)  |
| >10 km                                                     | 381               | 14               | (3.7) | 1.47  | (0.75–2.89) | 1.37                          | (0.67–2.77) | 2.20                          | (0.84–5.75)  |
| <b>Fourth or more birth order (<math>n = 5212</math>)</b>  |                   |                  |       |       |             |                               |             |                               |              |
| Neonatal mortality                                         |                   |                  |       |       |             |                               |             |                               |              |
| ≤1.5 km                                                    | 1000              | 20               | (2.0) | 1.15  | (0.62–2.16) | 0.92                          | (0.49–1.74) | 0.99                          | (0.40–2.44)  |
| >1.5–3.0 km                                                | 1314              | 23               | (1.8) | 1     | (reference) | 1                             | (reference) | 1                             | (reference)  |
| >3.0–5.0 km                                                | 1248              | 22               | (1.8) | 1.03  | (0.56–1.88) | 1.19                          | (0.65–2.17) | 1.02                          | (0.44–2.37)  |
| >5.0–10.0 km                                               | 1127              | 25               | (2.2) | 1.32  | (0.73–2.38) | 1.73                          | (0.94–3.19) | 1.33                          | (0.56–3.12)  |
| >10 km                                                     | 523               | 12               | (2.3) | 1.37  | (0.66–2.84) | 1.98                          | (0.92–4.26) | 2.17                          | (0.75–6.24)  |
| Infant mortality                                           |                   |                  |       |       |             |                               |             |                               |              |
| ≤1.5 km                                                    | 1000              | 43               | (4.3) | 1.03  | (0.66–1.62) | 0.98                          | (0.62–1.55) | 0.79                          | (0.42–1.47)  |
| >1.5–3.0 km                                                | 1314              | 55               | (4.2) | 1     | (reference) | 1                             | (reference) | 1                             | (reference)  |
| >3.0–5.0 km                                                | 1248              | 45               | (3.6) | 0.89  | (0.58–1.38) | 0.92                          | (0.60–1.43) | 0.79                          | (0.45–1.38)  |
| >5.0–10.0 km                                               | 1127              | 66               | (5.9) | 1.55  | (1.03–2.32) | 1.69                          | (1.11–2.57) | 1.25                          | (0.72–2.19)  |
| >10 km                                                     | 523               | 25               | (4.8) | 1.23  | (0.72–2.09) | 1.54                          | (0.88–2.72) | 1.73                          | (0.83–3.60)  |

OR, odds ratio; CI, confidence interval.

<sup>a</sup> Adjusted for the birth order, the type of the nearest health center (CSB I vs. all other), existence of reference hospital within 30 km, wealth, maternal education, religion, maternal smoking, maternal age at birth, and birth spacing. ( $n = 9436$ )

<sup>b</sup> In addition to model 1, adjusted for maternal health status at time of interview including anemia, height, and maternal body mass index. ( $n = 4569$ )
