# Supplementary material for: Association between Proximity to a Health Center and Early Childhood Mortality in Madagascar
Source: PLOS journal article supplement (doi:10.1371/journal.pone.0038370), 2012-06-04
Supplement: S7 (10.1371/journal.pone.0038370.s007) [file journal.pone.0038370.s007]

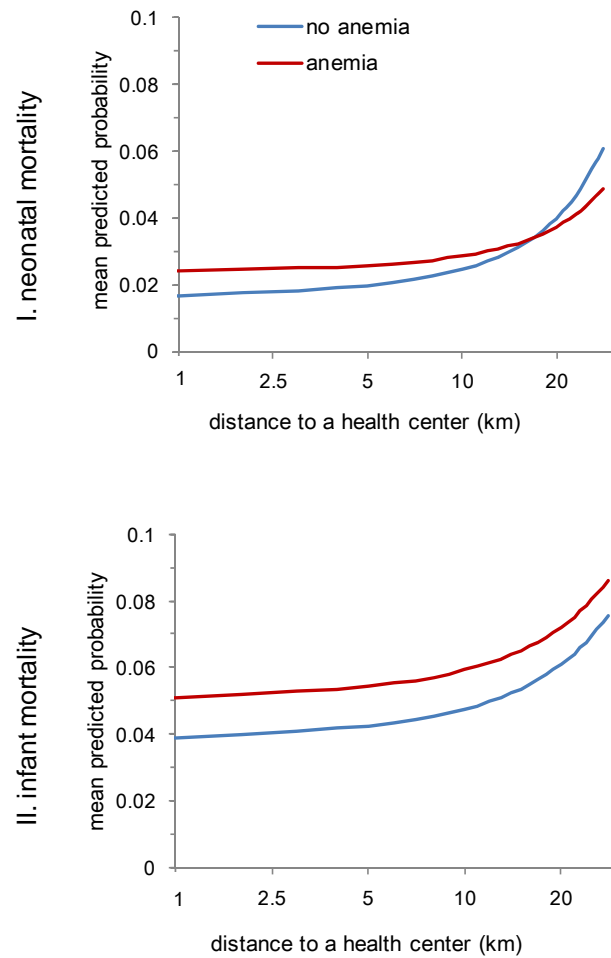

**Figure S3. Predicted probabilities for neonatal mortality and infant mortality stratified by maternal anemia.**

We modeled the distance to a health center as a continuous variable (per increase of 1 km), and used the logarithmic scale (base 2) for the graphs. We averaged the predicted probability for the group less than 1 km from a health center, and showed the probabilities for distance at 1 km increments.
